# Supplementary material
Source: Elsevier journal article supplement (https://comptes-rendus.academie-sciences.fr/chimie/article/10.1016/j.crci.2007.02.002/file/attach/mmc2.pdf)
Supplement: mmc2 [file mmc2.pdf]

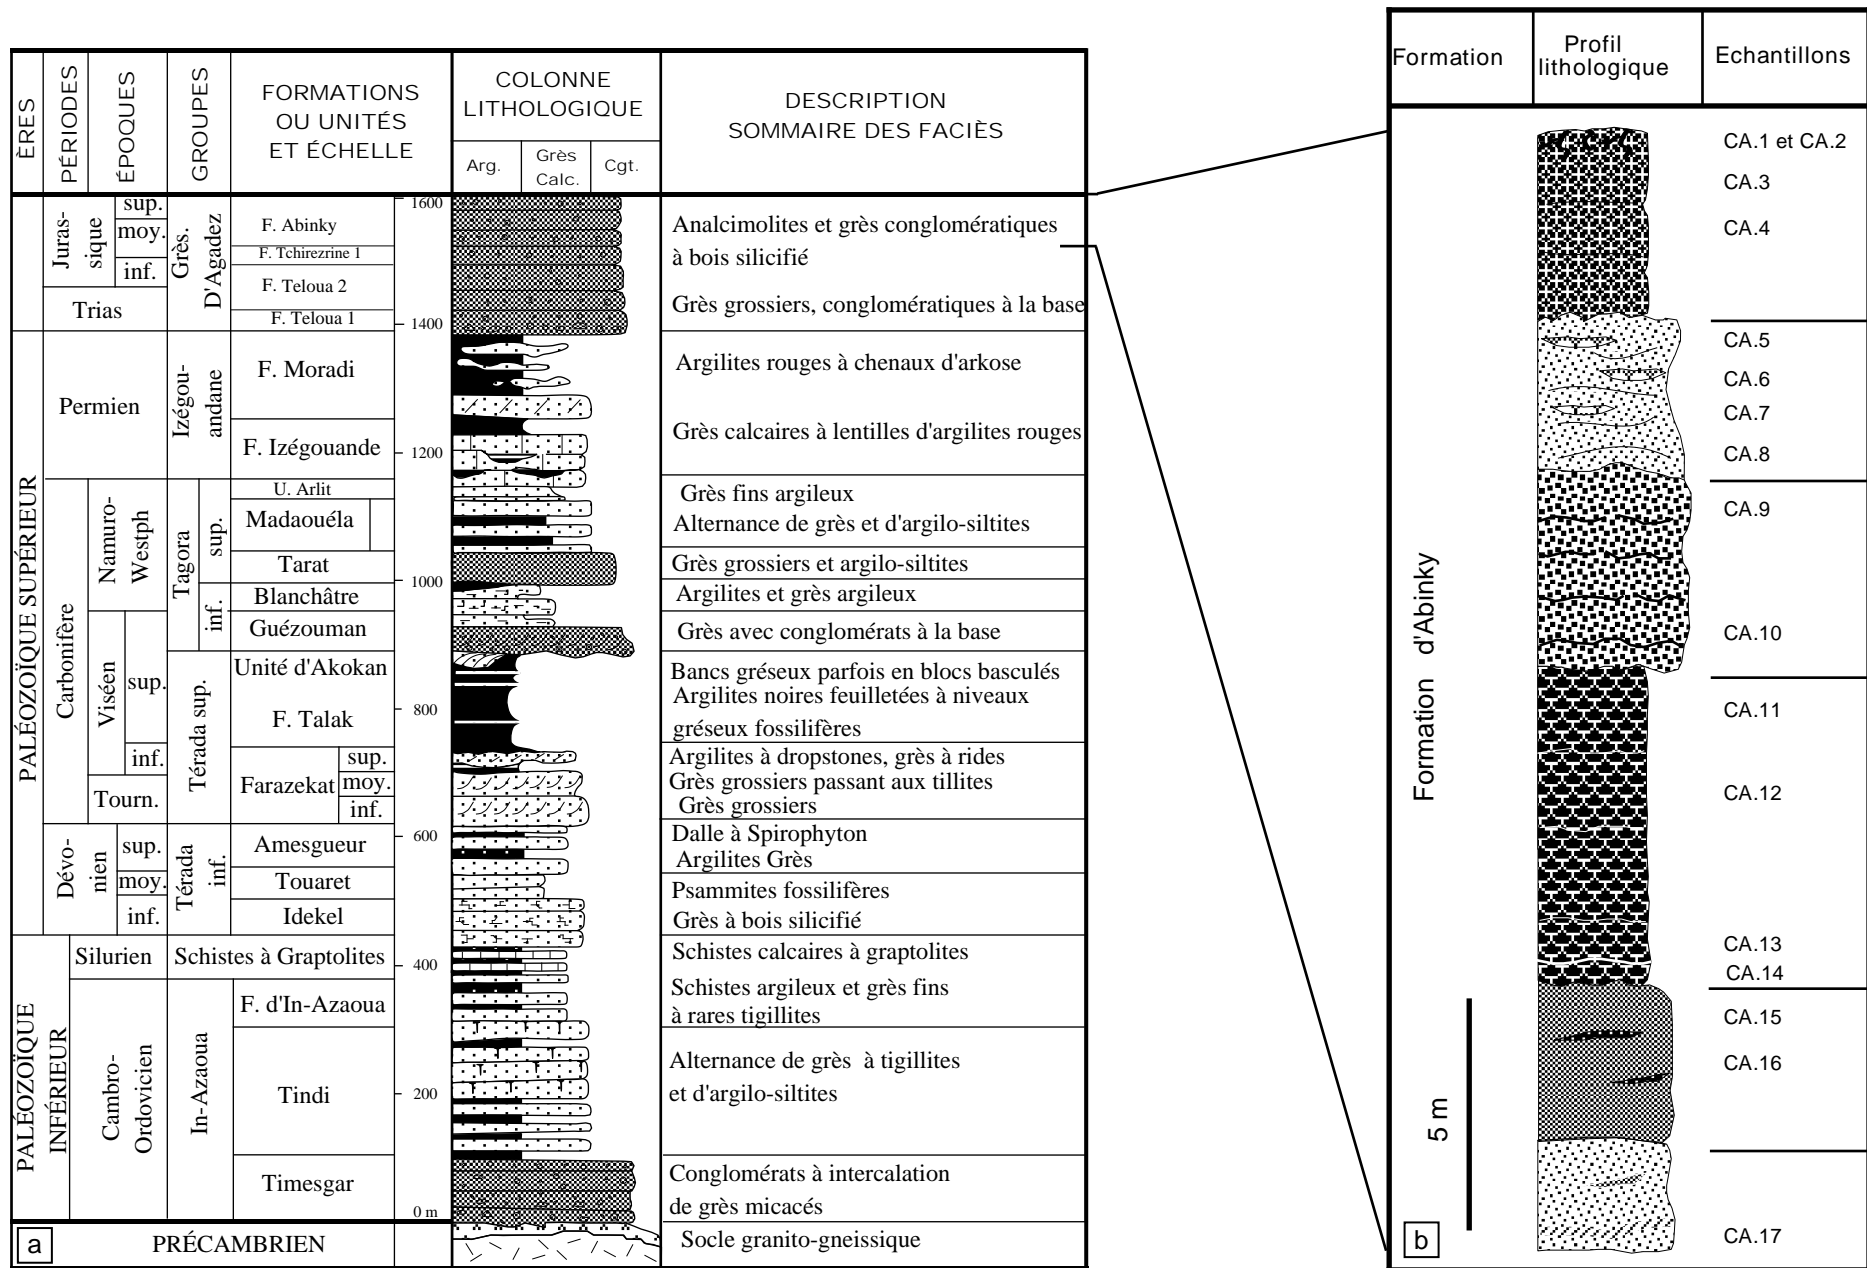

Figure S-2 : - a) Colonne lithostratigraphique du bassin de Tim Mersoui sur la bordure ouest de l'Air.  
- b) Localisation des échantillons prélevés dans la carrière d'Abinky, à l'Ouest de la flexure-faille d'Arlet et de la mine d'Akouta (voir fig. 1).
